# Supplementary material
Source: PubMed Central journal article supplement (PMC193573)
Supplement: pnas_1630810100_14.pdf [file pnas_1630810100_14.pdf]

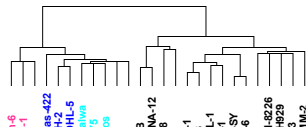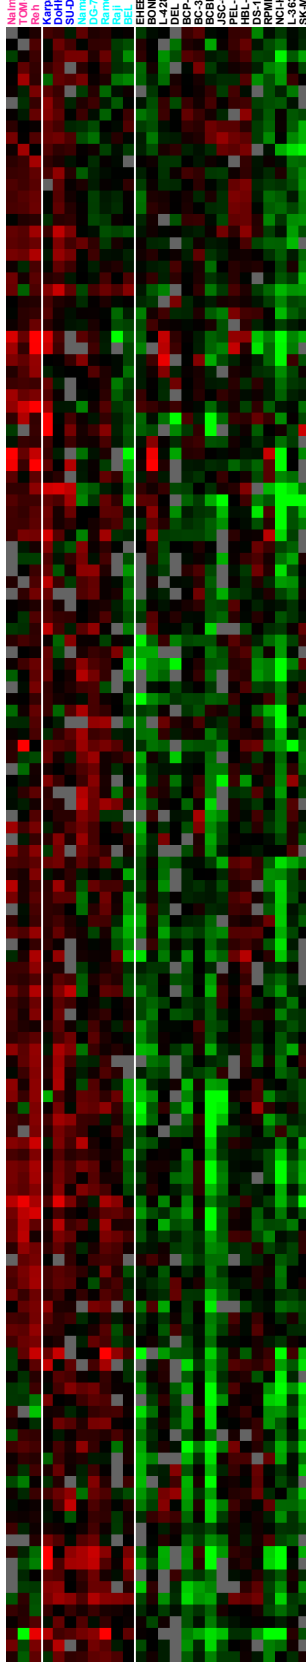

| HUGO ID  | Name                                                     |
|----------|----------------------------------------------------------|
| CCDC3L   | Cdc5-related protein (PCDC5RFP)                          |
| HSU3209  | transformer-2 alpha (tra-2 alpha)                        |
| CCDC10   | similar to TR.G56023 G56023 HDCC10                       |
| NFYB     | CAAT-box DNA binding protein subunit B                   |
| GIT21    | Bruce's tyrosine kinase-associated protein               |
| CC14     | stimulator of TAR RNA binding (SR16)                     |
| RY1      | RY-1 putative nucleic acid binding protein               |
| DVL2     | dishevelled 2 (DVL2)                                     |
| RPL13    | 60S RIBOSOMAL PROTEIN L13                                |
| C14ORF3  | Hydroxyacyl-Coenzyme A dehydrogenase, beta subunit       |
| SMS      | spermine synthase                                        |
| SF3A1    | splicing factor SF3a120                                  |
| KNL4     | oIP binding protein (ODP-1)                              |
| TUBA1    | alpha-tubulin                                            |
| TUBA1    | Alpha-tubulin (K00558)                                   |
| TUBA1    | Alpha-tubulin (K00558)                                   |
| TUBA1    | TUBULIN ALPHA-4 CHAIN                                    |
| FRP8     | FRP8 protein                                             |
| RPA1     | Replication protein A 70 kD subunit                      |
| TUBB5    | TUBULIN BETA-1 CHAIN                                     |
| HNRPA2B1 | Heterogeneous nuclear ribonucleoprotein A2/B1            |
| SNRPF    | Sm protein F                                             |
| CKS2     | CDC28 protein kinase 2                                   |
| XPO1     | Small nuclear ribonucleoprotein polypeptide CRM1 protein |
| ZNF161   | DB1                                                      |
| FZD8     | similar to TR.G1151252 transmembrane receptor            |
| ODC1     | putative oral tumor suppressor protein (doc-1)           |
| CDK2     | cdc2-related protein kinase                              |
| APL1     | amyloid precursor-like protein 1                         |
| SNRNP    | Small nuclear ribonucleoprotein polypeptide N            |
| SNRNP82  | Small nuclear ribonucleoprotein polypeptide B'           |
| PSMA6    | PROTEASOME IOTA CHAIN                                    |
| GALNT1   | UDP-GalNAc polypeptide N-acetylglucosaminyltransferase   |
| HURE11B  | HURE11 homolog hMure11                                   |
| SFRS2IP  | novel member of serine-arginine domain protein, SRp129   |
| PIK3R1   | P13-kinase associated p85                                |
| PIK3R1   | P13-kinase associated p85                                |
| TRIO     | TRIO                                                     |
| CHD3     | similar to TR.E149079 E149079 MI-2 PROTEIN               |
| ACAT2    | T-COMPLEX PROTEIN 1, ALPHA SUBUNIT                       |
| ID1      | homolog of yeast IPP isomerase                           |
| PRKCL2   | lipid-activated, protein kinase PRK2                     |
| HMGOR    | 3-hydroxy-3-methylglutaryl-coenzyme A reductase          |
| COXK     | coxin K (CFR4)                                           |
| COXK     | coxin K (CFR4)                                           |
| GABPA    | GA-binding protein transcription factor, alpha subunit   |
| YY1      | YY1 transcription factor                                 |
| TCF17    | HLK1                                                     |
| CFP8     | HPR14                                                    |
| HNRPK    | Heterogeneous nuclear ribonucleoprotein K                |
| UGCG     | ceramide glucosyltransferase                             |
| SLC16A1  | Solute carrier family 16, member 3                       |
| DKC1     | Non-catalytic region of tyrosine kinase                  |
| ZNF43    | Zinc finger protein 43 (HTF6)                            |
| ZNF273   | Zinc finger protein 9                                    |
| OIP5     | Opa-interacting protein OIP5                             |
| REG1B    | regenerating protein beta                                |
| ZNF198   | ZNF198 zinc finger protein                               |
| KIF5B    | KINESIN HEAVY CHAIN                                      |
| EZH2     | enhancer of zeste homolog 2 (EZH2)                       |
| PPP2R5C  | Protein phosphatase 2A, regulatory subunit B' alpha-1    |
| RBBP8    | CtBP interacting protein CtBP (CtBP)                     |
| KIAA0332 | KIAA0332                                                 |
| TOPBP1   | KIAA0339 Topoisomerase II binding protein                |
| KIAA0419 | KIAA0420                                                 |
| RFC4     | Replication factor C, 37-kD subunit                      |
| RFC5     | replication factor C, 38-kDa subunit                     |
| RFC5     | replication factor C (activator 1) 5 (36.5kD)            |
| BRCA1    | Breast cancer 1, early onset                             |
| MCH3     | Minichromosome maintenance deficient (S. cerevisiae) 3   |
| KIAA0105 | KIAA0105 Wilms' tumor 1-associated protein               |
| M11S1    | GPI-anchored protein p137                                |
| ?        | Gu protein p137                                          |
| SNRPF    | Sm protein G                                             |
| TNFRSF11 | TNF-related ligand TRANCE                                |
| KPNB2    | transportin (TRN)                                        |
| DDX9     | DEAD(H) (Asp-Glu-Ala-Asp/His) box polypeptide 9          |
| ?        | clone ABQ2BR11 (CAC)(G/TG)n repeat-containing            |
| CSE1L    | chromosome segregation gene homolog CAS                  |
| SSRP1    | High mobility group box                                  |
| DNASE1L1 | MUSCLE-SPECIFIC DNASE II-LIKE PRECURSOR                  |
| ADE2H1   | MULTIFUNCTIONAL PROTEIN ADE2                             |
| RNPS1    | RNA-binding protein done ES.1                            |
| KIAA0097 | KIAA0097                                                 |
| BCL7B    | B cell lymphoma protein 7B                               |
| SRPK1    | serine kinase                                            |
| CHC1     | Chromosome condensation 1                                |
| NFYA     | Nuclear transcription factor Y, alpha                    |
| U2AF1    | SPLICING FACTOR U2AF 35 KD SUBUNIT                       |
| CHKL1    | checkpoint kinase Chk1 (CHK1)                            |
| CHEK1    | checkpoint kinase Chk1 (CHK1)                            |
| CDCC6    | similar to TR.G1163108 origin recognition protein        |
| MCM4     | CDC21 HOMOLOG                                            |
| MCM5     | CDC46 HOMOLOG                                            |
| NASP     | Nuclear autoantigenic sperm protein (histone-binding)    |
| PPP2CA   | Protein phosphatase 2, catalytic subunit, alpha isoform  |
| SERPINE2 | Plasminogen activator inhibitor, type II                 |
| PCNA     | Proliferating cell nuclear antigen                       |
| TLOC1    | translocation protein-1                                  |
| HMG1     | High-mobility group (nonhistone chromosomal) protein 1   |
| LAP1     | STAT1-like                                               |
| HMG17    | non-histone chromosomal protein HMG-17                   |
| MGC12250 | Prothymosin alpha                                        |
| FBRN     | D105102                                                  |
| SET      | SET PROTEIN                                              |
| SFRS10   | putative splice factor transformer2-beta                 |
| SFRS7    | 9G8 splicing factor                                      |
| FUS      | Highly similar to TLS protein                            |
| NR4A3    | mitogen induced nuclear orphan receptor                  |
| SRP46    | PRE-MRNA SPLICING FACTOR SF2, P33 SUBUNIT                |
| SFRS3    | PRE-MRNA SPLICING FACTOR SRP20                           |
| RBMX     | Heterogeneous nuclear ribonucleoprotein G                |
| TUBB5    | beta-tubulin gene (5-beta) with ten Alu                  |
| HMMR     | Hyaluronan-mediated motility receptor (RHAMM)            |
| NDUFB2   | NADH dehydrogenase (ubiquinone) flavoprotein 2 (24kD)    |
| CDCC2    | Cell division cycle 2, G1 to S and G2 to M               |
| SOX3     | SOX-3 PROTEIN                                            |
| MAD2L1   | mitotic feedback control protein Mad2 homolog            |
| CONA2    | 75-kD autoantigen (PM-Scl1)                              |
| CA150    | putative transcription factor CA150                      |
| KIAA0101 | KIAA0101                                                 |
| LBR      | Lamin B receptor                                         |
| CCNB1    | Cyclin B1                                                |
| KNSL2    | kinesin-related protein                                  |
| STK15    | aurora/PL1-related kinase                                |
| CCNB2    | cyclin B2                                                |
| WYHA4    | Tyrosine 3-monooxygenase activation protein              |
| MATR3    | MATRIN 3                                                 |
| TSN      | translin                                                 |
| RFC3     | replication factor C, 38-kDa subunit                     |
| RFC3     | Replication factor C (activator 1) 3 (38kD)              |
| DNAJC3   | protein kinase inhibitor p58                             |
| TDFP1    | E2F-related transcription factor (DP-1)                  |
| TDFP1    | E2F-related transcription factor (DP-1)                  |
| KIAA0094 | KIAA0094                                                 |
| TARDP    | TAR DNA-binding protein-43                               |
| FONDPA   | Homolog 1 of Discophila forkhead (rhodomyosarcoma)       |
| FONDPA   | Homolog 1 of Discophila forkhead (rhodomyosarcoma)       |
| SSP29    | silver-stainable protein SSP29 mRNA                      |

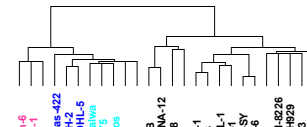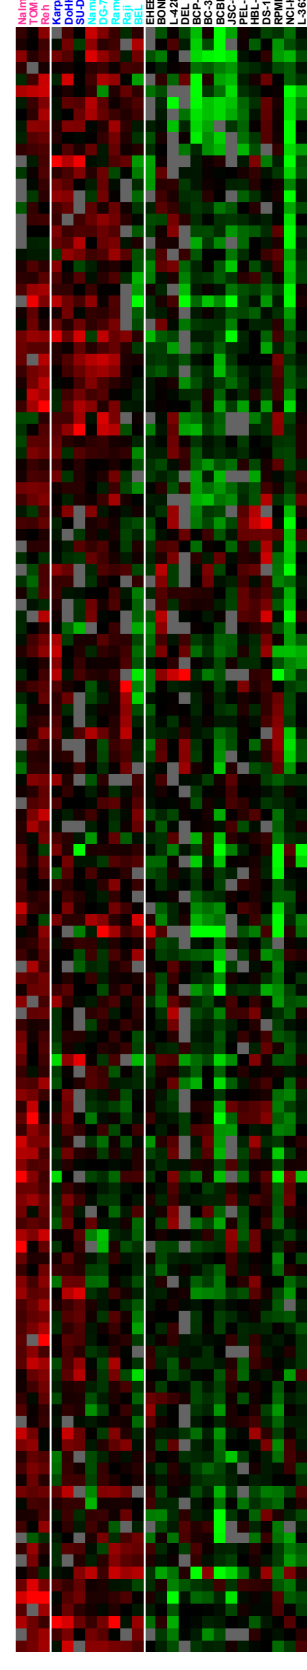

| HUGO ID   | Name                                                           |
|-----------|----------------------------------------------------------------|
| RAD51     | Replication protein A (E coli RecA homolog)                    |
| HMG2      | High-mobility group (nonhistone chromosomal) protein 2         |
| SPS       | selenium donor protein (selD)                                  |
| CES2      | Carboxylesterase 2 (liver)                                     |
| NOE1      | clone 23876 neuronal of factomedin-related ER localized        |
| ZNF22     | HKR-11                                                         |
| FKBP5     | 54 kDa progesterone receptor-associated FKBP54                 |
| FKBP5     | 54 kDa progesterone receptor-associated FKBP54                 |
| CUL4A     | Hs-cul4A                                                       |
| CUL4A     | Hs-cul4A                                                       |
| CLCN6     | putative chloride channel                                      |
| FAL2      | fetal Alz-50-reactive clone 1 (FAC1)                           |
| C17orf23  | General transcription factor I1H, polypeptide 3                |
| TRIP      | hTRIP                                                          |
| GM2A      | glucose transporter pseudogene                                 |
| RBBP6     | RBBP6                                                          |
| DARS1     | ASPARTYL-TRNA SYNTHETASE                                       |
| DR1       | Down-regulator of transcription 1, TBP-b                       |
| ZFP161    | zinc finger 5 protein                                          |
| MDM4      | similar to SWI602_human O00987 MDM2 protein                    |
| SOS1      | guanine nucleotide exchange factor (SOS1)                      |
| UBES3A    | Ubiquitin protein ligase E3A                                   |
| TIAT1     | NUCLEOLYSIN TIA-1                                              |
| MEF2A     | MYOCYTE-SPECIFIC ENHANCER FACTOR 2, MEF2                       |
| EIF4A2    | Eukaryotic translation initiation factor 4A (eIF-4A) isoform 2 |
| DLG1      | homolog of Drosophila discs large protein, isoform 2           |
| FLJ13910  | Weakly similar to coded for by C. elegans                      |
| KIAA0029  | KIAA0029                                                       |
| RBBP4     | RETINOBLASTOMA BINDING PROTEIN P48                             |
| DDR1      | Receptor protein-tyrosine kinase EDDR1                         |
| MADH4     | homologous deletion target in pancreatic carcinoma (DPC4)      |
| HP1-BP74  | Weakly similar to cortactin associated protein                 |
| FUS       | fusion, derived from t(12;16) malignant liposarcoma            |
| ?         | protein immuno-reactive with anti-PTH                          |
| RPL15     | ribosomal protein L10                                          |
| ?         | STRESS-ACTIVATED PROTEIN KINASE JNK2                           |
| ?         | STRESS-ACTIVATED PROTEIN KINASE JNK2                           |
| NSEP1     | dbpB-like protein                                              |
| SP3       | Sp3 transcription factor                                       |
| HNRPU     | Heterogeneous nuclear ribonucleoprotein U                      |
| TRIP2     | Tripeptidyl peptidase II                                       |
| NUDT1     | 8-oxo-7,8-dihydroguanosine triphosphatase                      |
| SLC20A1   | leukemia virus receptor 1 (GLVR)                               |
| SRP9      | Signal recognition particle 9 kD protein                       |
| KIAA0159  | KIAA0159                                                       |
| KIAA1233  | KIAA1233 protein                                               |
| GMPB      | similar to gpM86492 glia maturation factor beta                |
| GMPB      | Glia maturation factor beta                                    |
| HSU15582  | acidic 82 kDa protein                                          |
| EST       | RNA polymerase II holoenzyme component SRB7                    |
| SURB7     | INSULIN-DEGRADING ENZYME                                       |
| IDE       | MOP1                                                           |
| HF1A      | Mch3 isoform alpha (Mch3)                                      |
| MAP3K7    | TGF-beta activated kinase 1a                                   |
| GNL3      | G protein gamma-10 subunit                                     |
| GALL1     | Galactose-1-phosphate uridylyl transferase                     |
| MRPL3     | MRL3 mRNA for ribosomal protein L3 homologue                   |
| MRPL3     | MRL3 mRNA for ribosomal protein L3 homologue                   |
| MRPL3     | MRL3 mRNA for ribosomal protein L3 homologue                   |
| GMP5      | guanosine 5'-monophosphate synthase                            |
| NUJ153    | nuclear pore complex protein hnuj153                           |
| GRK3      | Glutamate receptor, ionotropic, kainate                        |
| MTR       | 5-methyltetrahydrofolate-homocysteine methyltransferase        |
| MAX       | MAX protein                                                    |
| SNRNP     | U1 snRNP-specific protein A                                    |
| SNRNP     | U1 small nuclear ribonucleoprotein A                           |
| CHAF1B    | chromatin assembly factor-I p60 subunit                        |
| CHAF1B    | proteasomal membrane protein 69 (PMP69)                        |
| KIAA0008  | KIAA0008                                                       |
| HNK-1ST   | HNK-1 sulfotransferase                                         |
| ESCH10    | cyclin-selective ubiquitin carrier protein                     |
| SAE1      | activation of Sentrin/SUMO protein AOS1                        |
| GTF2F2    | TRANSCRIPTION INITIATION FACTOR IIF, BETA SUBUNIT              |
| PPP2CA    | Protein phosphatase 2, catalytic subunit, alpha isoform        |
| RANBP1    | RAN binding protein 1                                          |
| CD81      | CD81 ANTIGEN                                                   |
| CYB5      | Cytochrome b-5                                                 |
| DAXX      | similar to TR.O15141 O15141 DAXX                               |
| KIAA0377  | KIAA0377                                                       |
| APEX      | APEX nuclease (multifunctional DNA repair enzyme)              |
| KIAA0670  | Weakly similar to coded for by C. elegans                      |
| PABP2     | poly(A) binding protein II (PABP2)                             |
| RNPS1     | ubiquitin carrier protein (E2-EFP)                             |
| CBX1      | heterochromatin protein p25                                    |
| PPGB      | Protective protein for beta-galactosidase (galactosialidosis)  |
| KPNB1     | importin beta subunit                                          |
| BCAA      | HYPOTHETICAL MYELOID CELL LINE PROTEIN 7                       |
| BIRC1     | neuron of apoptosis inhibitory protein                         |
| SAH       | SA mRNA for SA gene product                                    |
| HSTRSBETA | TAT beta protein                                               |
| HNRNP     | HrRNP F protein                                                |
| PRKCK     | protein kinase C-L (PRKCL)                                     |
| RBM3      | putative RNA binding protein RNPL                              |
| NSMAF     | FAN protein                                                    |
| POLE      | DNA polymerase epsilon, catalytic polypeptide                  |
| POLE      | DNA POLYMERASE EPSILON, CATALYTIC SUBUNIT                      |
| PTB       | polyomavirus tract binding protein (hRNP1)                     |
| H2AFX     | HISTONE H2A.X                                                  |
| CTBP1     | CtBP                                                           |
| CTBP1     | CtBP                                                           |
| MGC22721  | Laminin, beta 2 (laminin 5)                                    |
| PYCS      | Pyrolysine-5-carboxylate synthetase                            |
| TNRC11    | OPA-containing protein                                         |
| HCFC1     | HCFC1 gene related                                             |
| TR        | asparaginyl beta-hydroxylase                                   |
| SNRP70    | U1 snRNP 70K protein                                           |
| TRAP150   | thyroid hormone receptor-associated protein complex            |
| CLGFP1    | RNA-binding protein CLG-SP/hNab50 (NAB50)                      |
| ELAVL1    | HuR RNA binding protein (HuR)                                  |
| NAP1L4    | nucleosome assembly protein 2                                  |
| HLALS     | class I histone poly(ADP-ribose) polymerase                    |
| SBAT1     | Specific AT-rich sequence binding protein                      |
| RBM10     | DXS237E                                                        |
| HNRPA1    | Heterogeneous nuclear ribonucleoprotein A1                     |
| DDX17     | DEAD-box protein P72 (P72)                                     |
| ?         | EST unknown origin and sequence                                |
| NMT1      | GLYCYLPEPTIDE N-TETRADECANOYLTRANSFERASE                       |
| HMT1L2    | suppressor for yeast mutant                                    |
| HIP2      | huntingtin interacting protein (HIP2)                          |
| NCL       | NUCLEOLIN                                                      |
| PTMA      | Prothymosin alpha                                              |
| HNRPA0    | heterogeneous nuclear ribonucleoprotein A0                     |
| SNRNP     | TRANSCRIPTION-SENSITIVE PROTEIN IEF SSP                        |
| G22P1     | Thyroid autoantigen 70kD (Ku antigen)                          |
| PNN       | desmosome associated protein pinn / nuclear protein SDK3       |
| SFRS5     | splicing factor SFR40-1 (SFR40)                                |
| EIF1E1    | p18 component of aminoacyl-tRNA synthetase complex             |
| CHAF1B    | chromatin assembly factor-I p60 subunit                        |
| KIAA0410  | KIAA0410                                                       |
| NAP1L1    | NAP (nucleosome assembly protein) mRNA                         |
| NAP1L1    | NAP (nucleosome assembly protein) mRNA                         |
| MYBL2     | V-myb avian myeloblastosis viral oncogene homolog-like 2       |
| TCF12     | Transcription factor 12 (HTF4, helix-loop-helix TF 4)          |
| PRDX1     | Proliferation-associated gene A                                |
| SF3A3     | spliceosomal protein (SAP 61)                                  |
| SMARCB1   | Ini1                                                           |
| FLJ20085  | KIAA0123                                                       |
| RFC1      | replication factor c (activator 1) 1 (145kD)                   |
