# Supplementary material
Source: PubMed Central journal article supplement (PMC193573)
Supplement: pnas_1630810100_15.pdf [file pnas_1630810100_15.pdf]

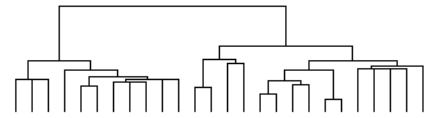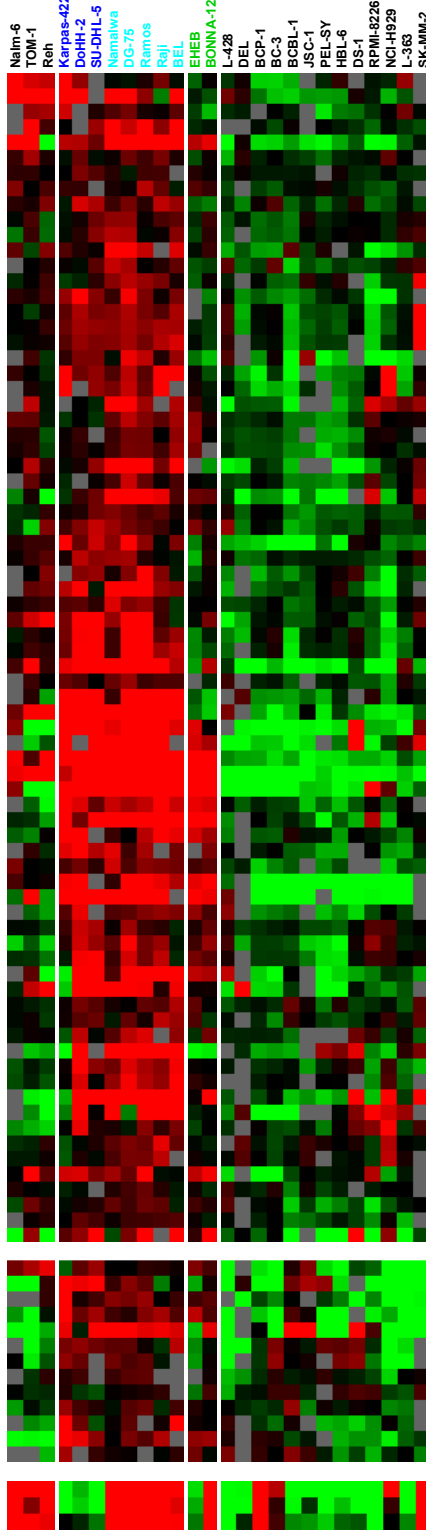

| HUGO ID  | Name                                                                      |
|----------|---------------------------------------------------------------------------|
| ATP1A3   | ATPase, Na <sup>+</sup> /K <sup>+</sup> transporting, alpha 3 polypeptide |
| CD24     | homologous to 3'UTR of human CD24 gene                                    |
| ABCC5    | multidrug resistance-associated protein (MRP5)                            |
| CD72     | CD72 antigen                                                              |
| TCL1A    | To cell leukemia/lymphoma 1                                               |
| ITGB2    | Integrin, beta 2 (antigen CD18 (p95))                                     |
| ?        | nuclear ribonucleoprotein partide (hnRNP)                                 |
| SGT1     | suppressor of G2 allele of skp1 homolog                                   |
| DNMT1    | DNA (cytosine-5)-methyltransferase 1                                      |
| GALE     | UDP-Galactose 4 epimerase (GALE)                                          |
| HADHSC   | L-3-hydroxyacyl-CoA dehydrogenase                                         |
| LIG4     | DNA ligase IV                                                             |
| LIG1     | Ligase I, DNA, ATP-dependent                                              |
| CEBPG    | CCAAT/enhancer binding protein (C/EBP), gamma                             |
| DCK      | Deoxycytidine kinase                                                      |
| TCEA1    | TRANSCRIPTION ELONGATION FACTOR S-II                                      |
| TCN1     | TRANSCOBALAMIN I PRECURSOR                                                |
| POLA2    | DNA polymerase alpha subunit                                              |
| CCNG2    | cydin G2                                                                  |
| RNPC1    | Finkel-Biskis-Reilly murine sarcoma virus; Human seb4D                    |
| RNPC1    | Finkel-Biskis-Reilly murine sarcoma virus; Human seb4D                    |
| DGKD     | Diacylglycerol kinase delta                                               |
| KIAA0220 | Polycystic kidney disease protein 1                                       |
| KIAA0220 | calcium-dependent group X phospholipase A2                                |
| KIAA0220 | calcium-dependent group X phospholipase A2                                |
| ALDH5A1  | NAD <sup>+</sup> -dependent succinate-semialdehyde dehydrogenase          |
| CCNG2    | Polycystic kidney disease 1 (autosomal dominant)                          |
| PDCD4    | nuclear antigen H731-like protein                                         |
| SSH3BP1  | eps8 binding protein e3B1                                                 |
| MAP4K2   | B lymphocyte serine/threonine protein kinase (GC kinase)                  |
| MAPRE2   | novel T-cell activation protein                                           |
| ZNF1A    | Ikaros/LyF-1 homolog (hik-1)                                              |
| FLJ22624 | clone 23799                                                               |
| KIAA0355 | KIAA0355                                                                  |
| SFRS11   | arginine-rich nuclear protein                                             |
| ELF1     | ETS-RELATED TRANSCRIPTION FACTOR ELF-1                                    |
| WEE1     | WEE1-LIKE PROTEIN KINASE                                                  |
| WEE1     | similar to gb:X62048_cds1 WEE1-LIKE PROTEIN KINASE                        |
| LRMP     | lymphoid-restricted membrane protein (Jaw1)                               |
| HLCS     | Holocarboxylase synthetase ligase                                         |
| OSBPL10  | Weakly similar to similar to oxysterol-binding proteins                   |
| BCL6     | B cell lymphoma protein 6 (zinc finger protein 51)                        |
| ALOX5    | Arachidonate 5-lipoxygenase                                               |
| SIAT1    | Sialyltransferase 1 (beta-galactoside alpha-2,6-sialyltransferase)        |
| CD79A    | Immunoglobulin-associated alpha                                           |
| CD22     | CD22 antigen                                                              |
| RBL1     | Retinoblastoma-associated protein-like 107 KD                             |
| SCP2     | Steroid carrier protein 2                                                 |
| PLEK     | PLECKSTRIN                                                                |
| HLA-DOB  | MHC class II protein HLA-DO beta chain                                    |
| STX7     | syntaxin 7                                                                |
| ARHGEF7  | KIAA0142                                                                  |
| ?        | clone 23815                                                               |
| ICSBP1   | Interferon consensus sequence binding protein                             |
| UVRAG    | mRNA; UV Radiation Resistance Associated (UVRAG)                          |
| NCOA3    | similar to TR:G1314285 G1314285 GRIP1 (AIB1)                              |
| NCOA3    | Amplified in Breast Cancer (AIB1)                                         |
| NCOA3    | Amplified in Breast Cancer (AIB1)                                         |
| IL4R     | Interleukin 4 receptor                                                    |
| ARHGEF6  | KIAA0006                                                                  |
| AIP      | immunophilin homolog ARA9 mRNA, complete cds                              |
| LTBP1    | Latent transforming growth factor beta binding protein 1                  |
| POLH     | xeroderma pigmentosum variant RAD30                                       |
| PRKAR2B  | Protein kinase, cAMP-dependent, regulatory, type II, beta                 |
| UCP3     | Uncoupling protein 3 (mitochondrial, proton carrier)                      |
| VIL2     | Villin 2 (ezrin)                                                          |
| UCHL1    | Ubiquitin carboxyl-terminal hydrolase isozyme L1                          |
| BMP7     | Bone morphogenetic protein 7 precursor                                    |
| SEC14L1  | SEC14 (S. cerevisiae)-like                                                |
| EIF2S2   | translational initiation factor 2 beta subunit (eIF-2-beta)               |
| EIF2S2   | translational initiation factor 2 beta subunit (eIF-2-beta)               |
| RB1      | Retinoblastoma 1 (including osteosarcoma)                                 |
| TRIP3    | thyroid receptor interactor (TRIP3) mRNA                                  |
| PCM1     | autoantigen pericentriol material 1 (PCM-1)                               |
| NUP88    | Nup88 protein                                                             |
| GSTP1    | Glutathione-S-transferase pi-1                                            |
| ARHGDI5  | GDP-dissociation inhibitor protein (Ly-GDI)                               |
| PTPRC    | Protein tyrosine phosphatase, receptor type, c (CD45)                     |
| RNTRE    | Ribosomal protein S17                                                     |
| PLCG2    | Phospholipase C, gamma 2 (phosphatidylinositol-specific)                  |
| ALOX5AP  | 5-LIPOXYGENASE ACTIVATING PROTEIN                                         |
| TAL1     | T-cell acute lymphocytic leukemia 1                                       |
| SYK      | Spleen tyrosine kinase                                                    |
| RFC1     | DNA-binding protein (PO-GA)                                               |
| ATP2A2   | ATPase, Ca <sup>++</sup> transporting, cardiac muscle, slow twitch 2      |
| PDCD2    | similar to TR:Q16342 PROGRAMMED CELL DEATH-2                              |
| KIAA0326 | KIAA0326                                                                  |
| TANK     | TRAF family member-associated NFKB activator                              |
| HRB      | hematopoietic progenitor kinase (HPK1)                                    |
| IGHM     | Immunoglobulin mu                                                         |
| NA2      | transcription factor IL-4 Stat mRNA                                       |
| EDR2     | polyhomeotic 2 homolog (HPH2)                                             |
