# Supplementary material
Source: PubMed Central journal article supplement (PMC193573)
Supplement: pnas_1630810100_17.pdf [file pnas_1630810100_17.pdf]

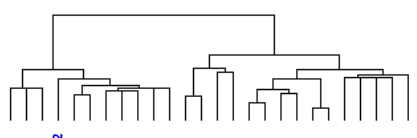

Nalm-6  
 TONI-1  
 Keni  
 Karpas-422  
 DdHH-2  
 SU-DHL-5  
 Namalwa  
 DG-7/6  
 Ramos  
 Raji  
 EHEC  
 BONNA-12  
 L-428  
 DEL  
 BCP-1  
 BC-3  
 BCBL-1  
 JSC-1  
 HEL-SY  
 HBL-6  
 DS-1  
 RPMI-8226  
 NCI-H929  
 L-363  
 SK-MMI-2

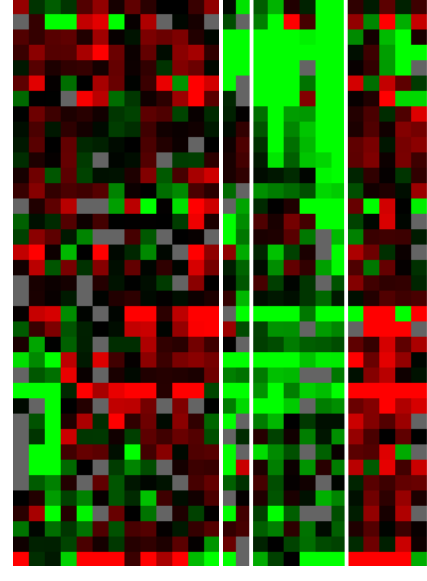

| HUGO ID  | Name                                                   |
|----------|--------------------------------------------------------|
| WASPIP   | PRRL-2 protein                                         |
| ITGAL    | Integrin, alpha L (antigen CD11A (p180))               |
| PIR121   | inducible protein (CYFIP2)                             |
| BTK      | TYROSINE-PROTEIN KINASE ATK                            |
| BTK      | Agammaglobulinaemia protein-tyrosine kinase atk        |
| CD53     | CD53 antigen                                           |
| CORO1A   | actin binding protein p57                              |
| BNIP2    | BCL2/adenovirus E1B 19kD-interacting protein 2 (BNIP2) |
| GRP58    | Probable protein disulfide isomerase ER-60             |
| GRP58    | Probable protein disulfide isomerase ER-60             |
| GRP58    | phospholipase C-alpha                                  |
| MLC-B    | myosin regulatory light chain                          |
| ABCD3    | Peroxisomal membrane protein 1                         |
| ADFP     | adipophilin                                            |
| HCLS1    | Hematopoietic lineage cell specific protein (HS1)      |
| PRKCBP1  | RACK-like protein PRKCBP1                              |
| TMSB4X   | thymosin beta-4                                        |
| INPP5D   | signaling inositol polyphosphate 5 phosphatase (SHIP)  |
| G1P3     | IFI27                                                  |
| CLK1     | clk1                                                   |
| CKB      | Creatine kinase B                                      |
| CTRB1    | Chymotrypsinogen B1                                    |
| SEC61B   | Protein transport protein SEC61 beta subunit           |
| BTG2     | BTG2 (BTG2)                                            |
| KIAA0226 | KIAA0226                                               |
| IGJ      | IMMUNOGLOBULIN J CHAIN                                 |
| TPD52    | 19.8 kDa protein                                       |
| KIAA0040 | KIAA0040                                               |
| GM2A     | GM2 ganglioside activator protein                      |
| KCNN3    | calcium-activated potassium channel (SKCA3)            |
| PSCDBP   | transcription factor (cytohesin binding protein)       |
| ACO2     | Aconitase 2, mitochondrial                             |
| OPCML    | similar to SW/OPC1_RAT P32736 opioid binding protein   |
| ETV5     | ETS-RELATED PROTEIN ERM                                |
| HADHA    | Hydroxyacyl-Coenzyme A dehydrogenase                   |
| HINT1    | protein kinase C inhibitor1 (PKCI-1)                   |
| IGL@     | rearranged immunoglobulin lambda light chain           |
| TFAP4    | Transcription factor AP-4                              |
| MYC      | MYC PROTO-ONCOGENE                                     |
| MYC      | V-myc avian myelocytomatosis viral oncogene homolog    |
| MAC30    | MAC30 mRNA, 3' end                                     |
| MAC30    | MAC30 mRNA, 3' end                                     |
| HNRPH1   | hnRNP H                                                |
| RFP      | Ret proto-oncogene                                     |

\*\*
