# Supplementary material
Source: PubMed Central journal article supplement (PMC193573)

**A**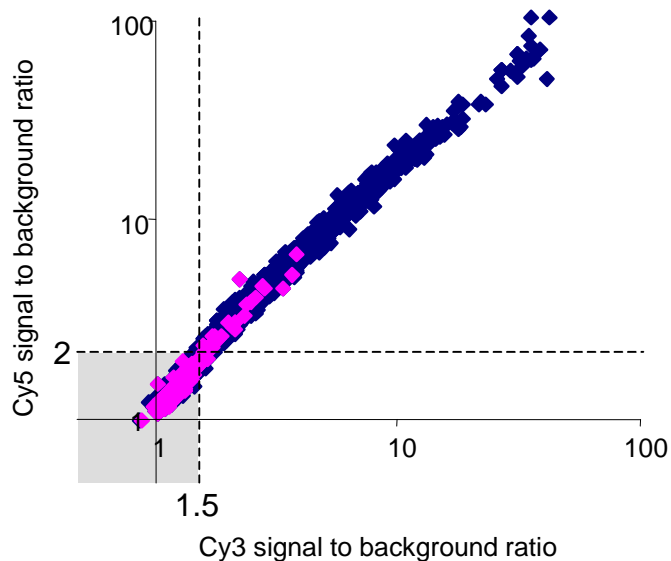**B**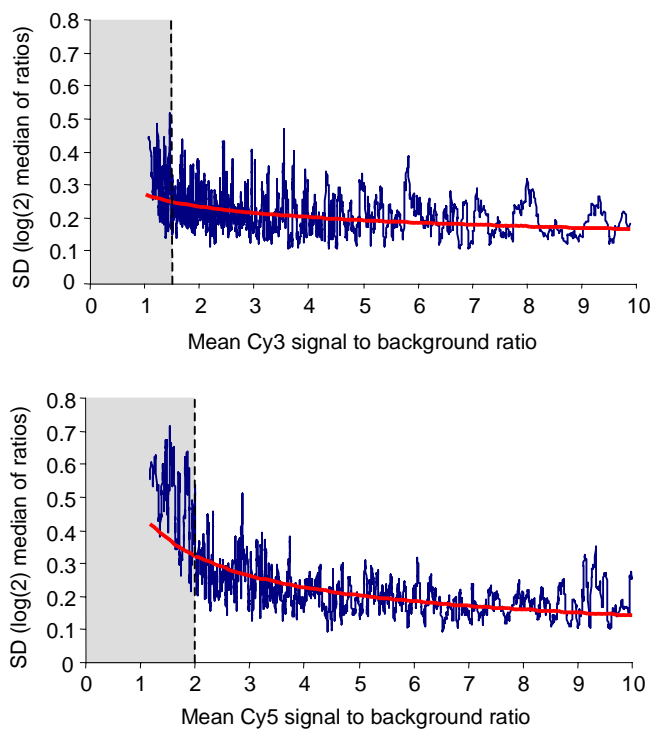**C**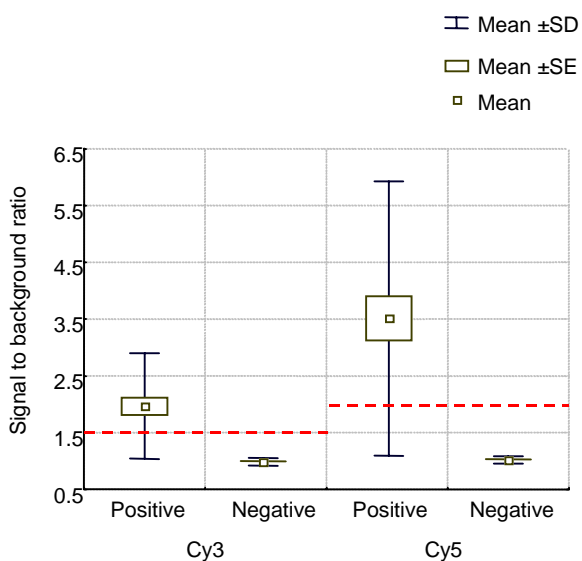**D**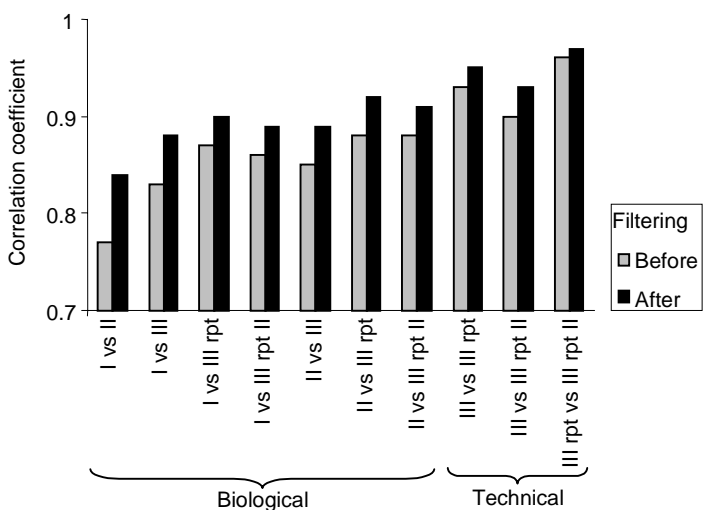

Supplement: pnas_1630810100_11.pdf [file pnas_1630810100_11.pdf]

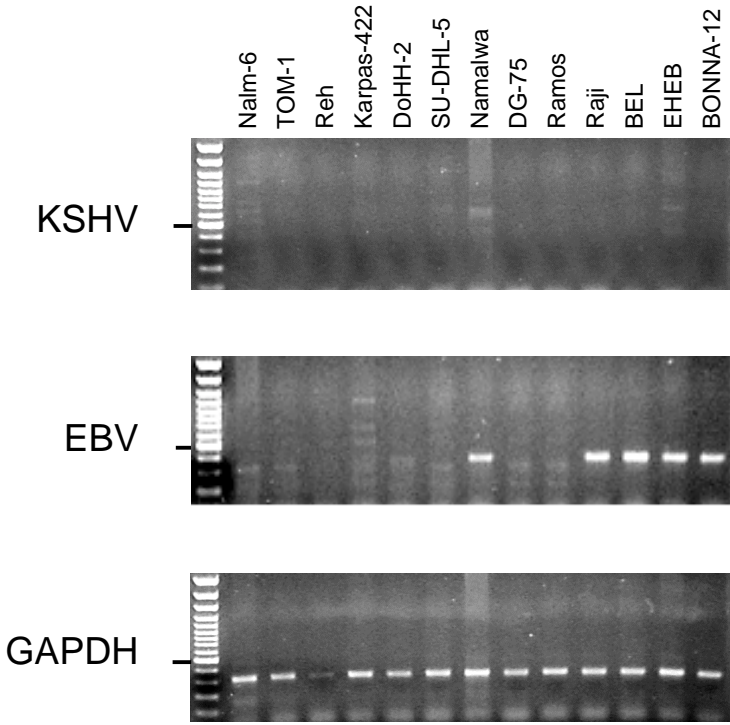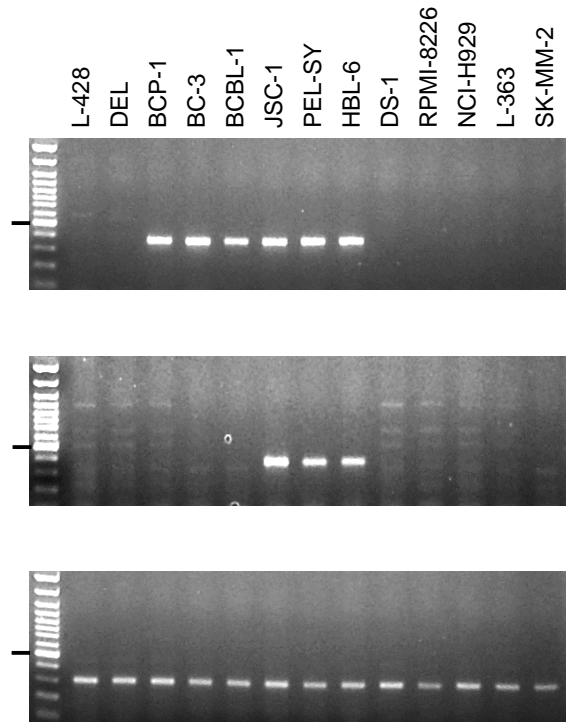

Supplement: pnas_1630810100_12.pdf [file pnas_1630810100_12.pdf]

**A**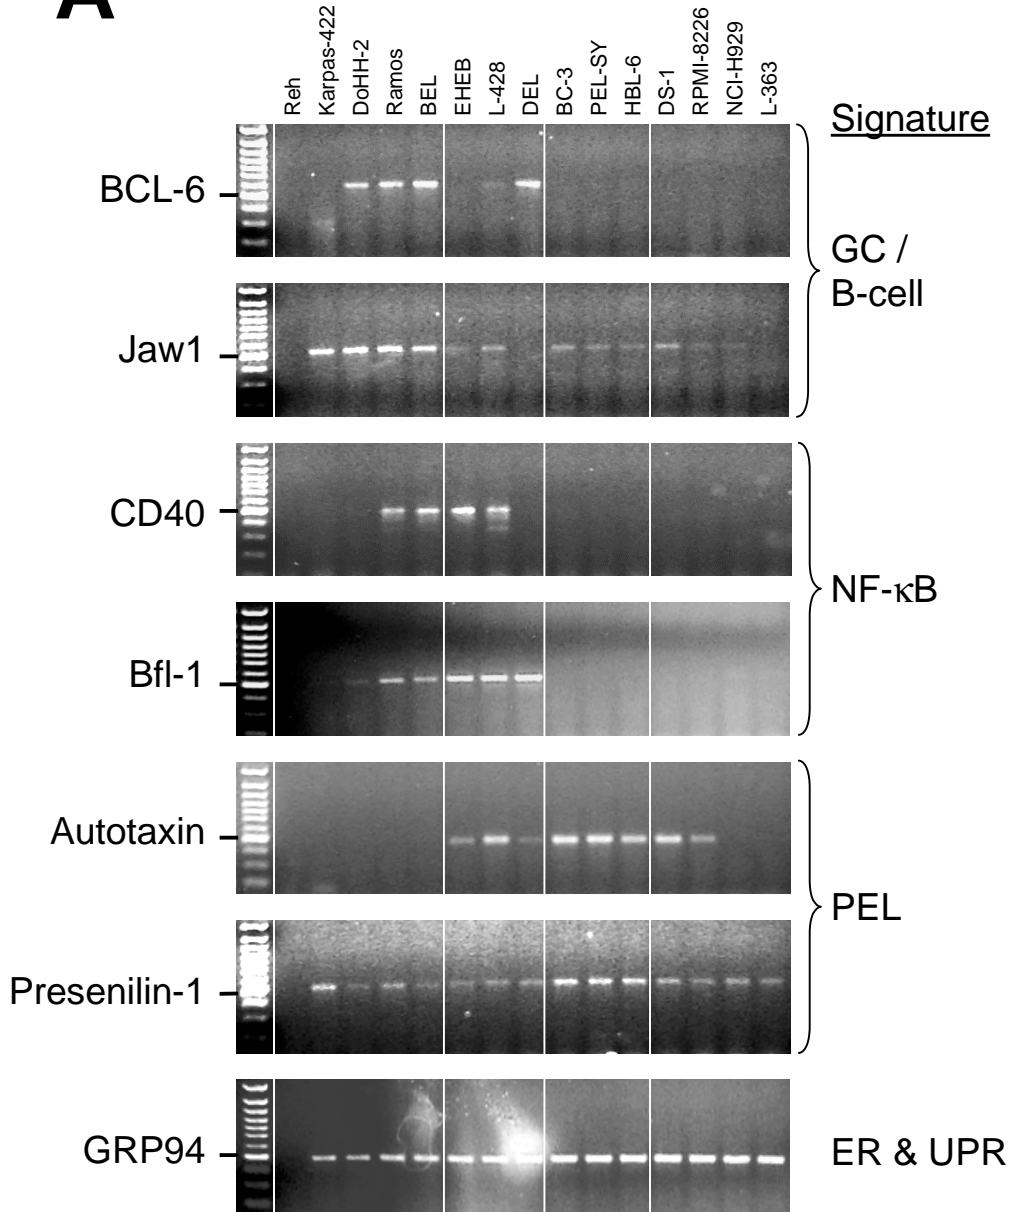**B**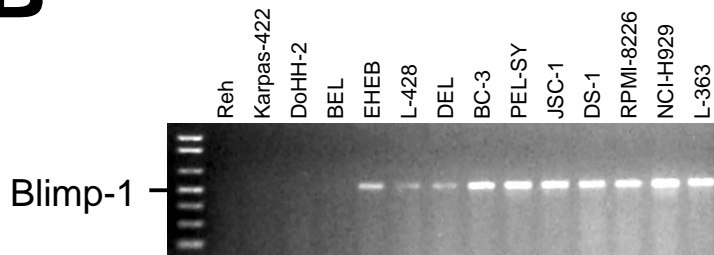

Supplement: pnas_1630810100_13.pdf [file pnas_1630810100_13.pdf]

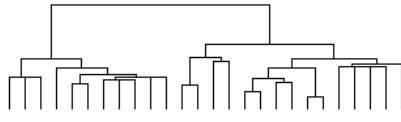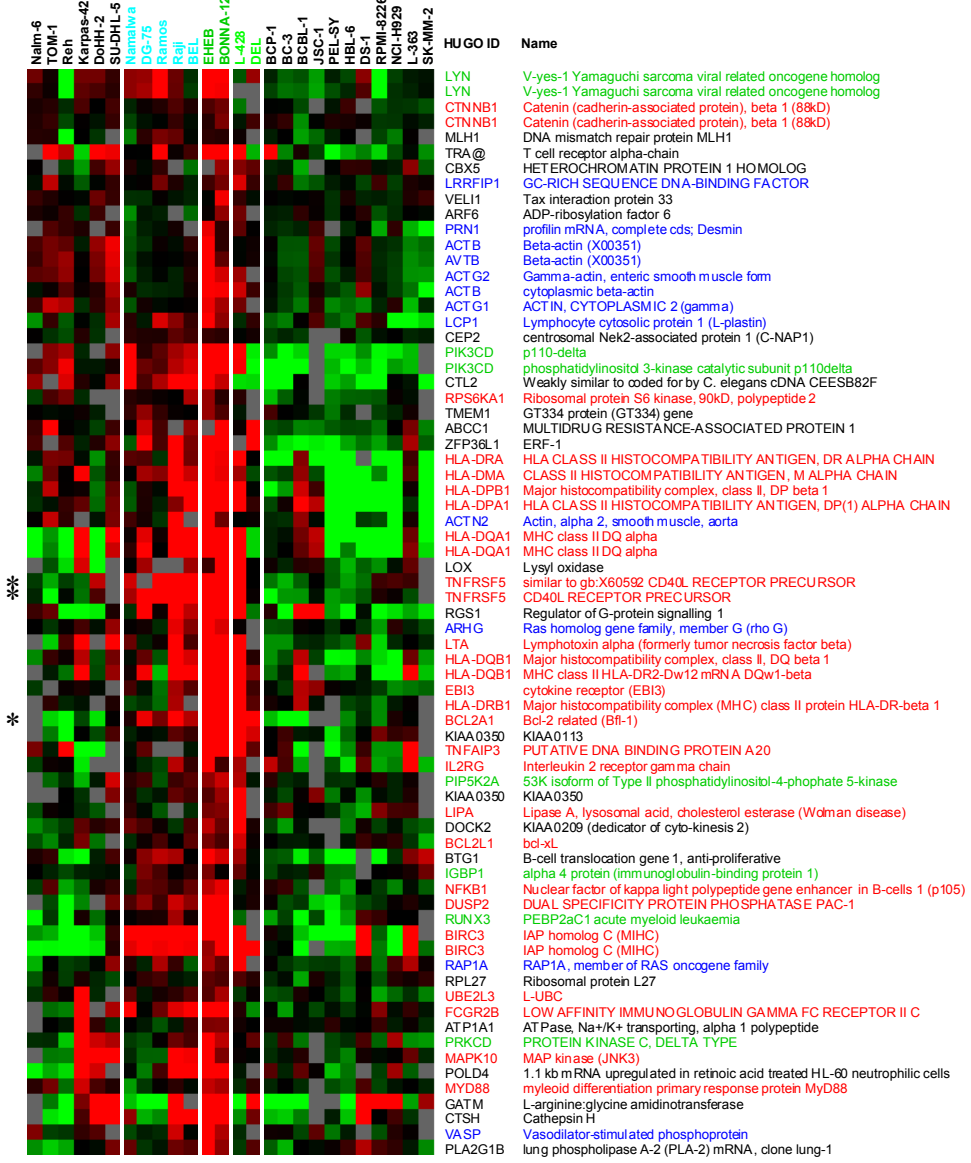

Supplement: pnas_1630810100_16.pdf [file pnas_1630810100_16.pdf]

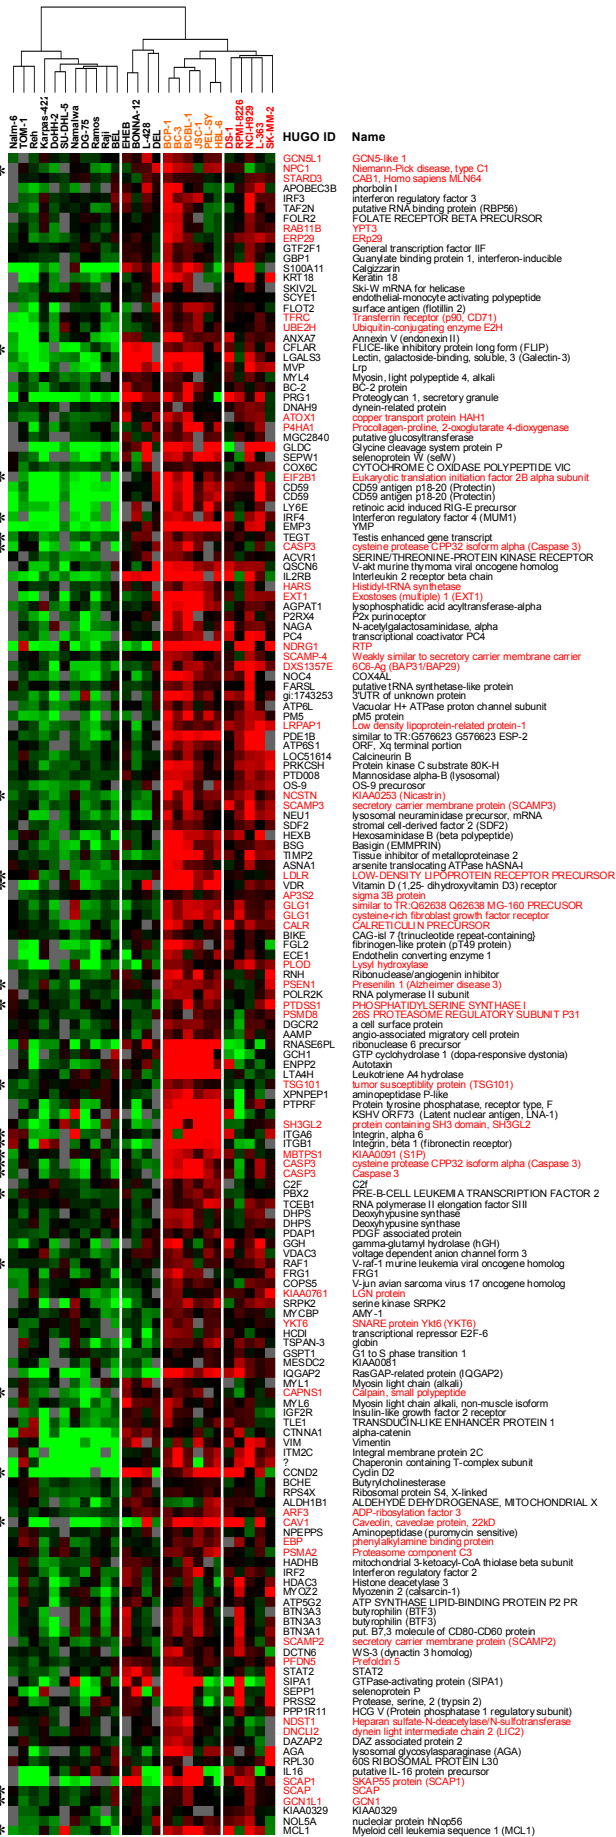

Supplement: pnas_1630810100_18.pdf [file pnas_1630810100_18.pdf]

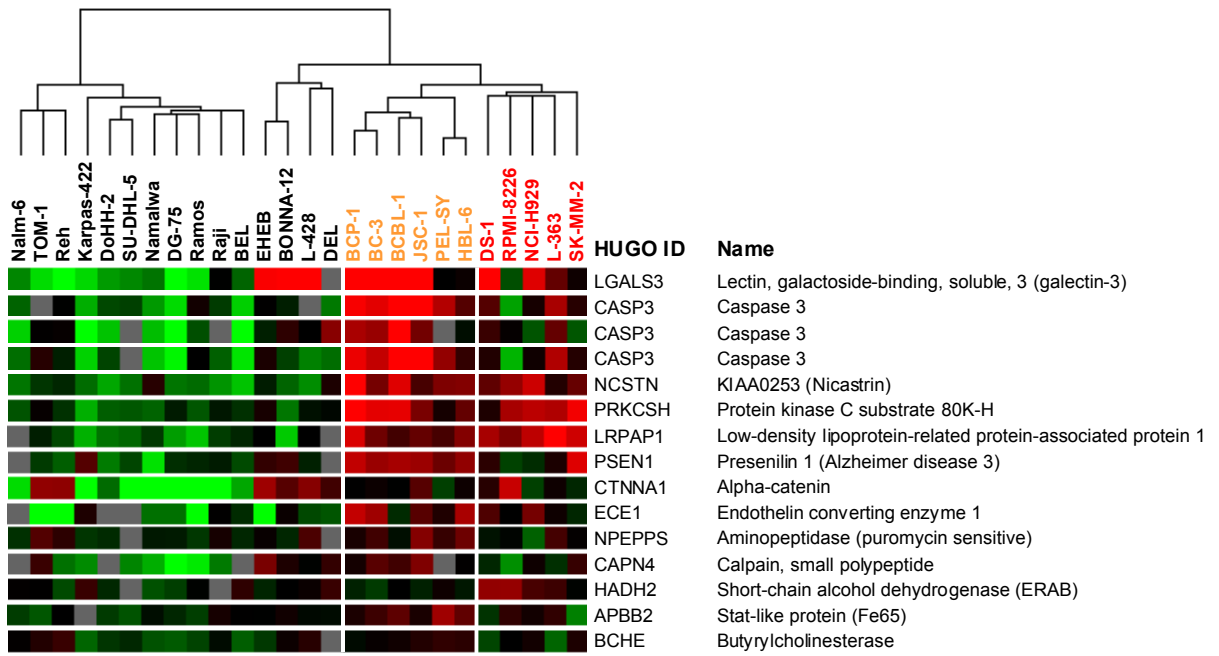

Supplement: pnas_1630810100_19.pdf [file pnas_1630810100_19.pdf]

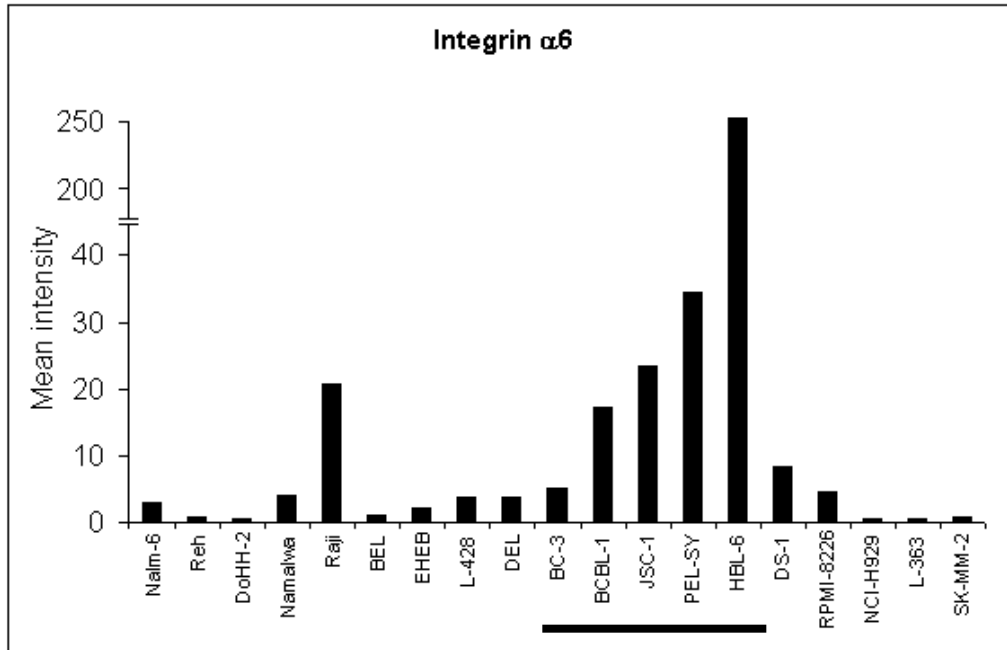

Supplement: pnas_1630810100_20.pdf [file pnas_1630810100_20.pdf]
